# Supplementary material for: Gene Expression Analysis Reveals Potential Regulatory Factors Response to Temperature Stress in Bemisia tabaci Mediterranean
Source: MDPI journal article supplement (doi:10.3390/genes14051013), 2023-04-29
Supplement: s1 [file s1]

Article

# Gene Expression Analysis Reveals Potential Response Factors to Temperature in *Bemisia tabaci* Mediterranean

Xiao-Na Shen<sup>1,2</sup>, Xiao-Di Wang<sup>2</sup>, Fang-Hao Wan<sup>2,3</sup>, Zhi-Chuang Lü<sup>2,\*</sup>, Wan-Xue Liu<sup>2</sup>,

- <sup>1</sup> Department of Basic Medicine, Changzhi Medical College, Changzhi, 046000, China;  
<sup>2</sup> State Key Laboratory for Biology of Plant Diseases and Insect Pests, Institute of Plant Protection, Chinese Academy of Agricultural Sciences, Beijing 100193, PR China;  
<sup>3</sup> Agricultural Genome Institute at Shenzhen, Chinese Academy of Agricultural Sciences, Shenzhen 518120, PR China;  
\* Correspondence: lvzhichuang@caas.cn; Tel./Fax: +86 10 82109572

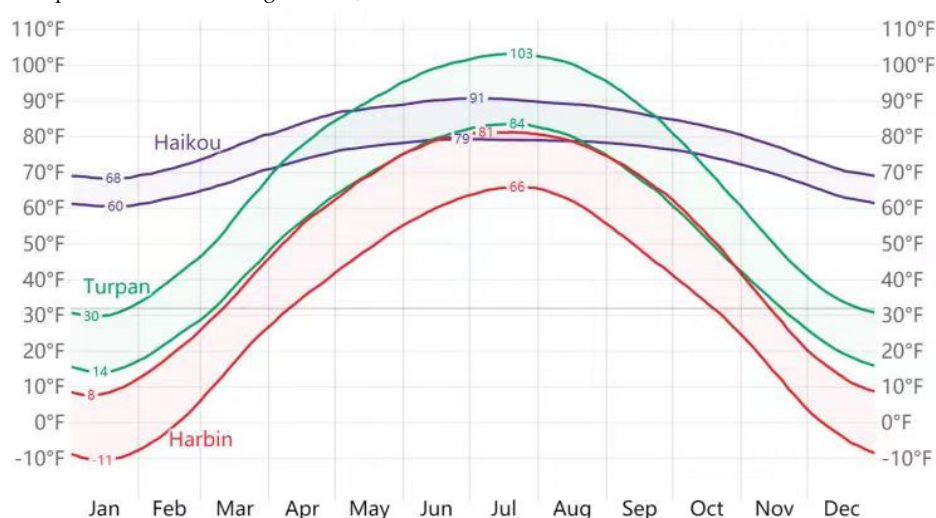

**Supplementary Figure S1.** The daily average high and low air temperatures at two meters above the ground (© WeatherSpark.com).

**Citation:** To be added by editorial staff during production.

Academic Editor: Firstname Last-name

Received: date

Revised: date

Accepted: date

Published: date

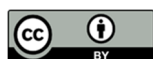

**Copyright:** © 2023 by the authors. Submitted for possible open access publication under the terms and conditions of the Creative Commons Attribution (CC BY) license (<https://creativecommons.org/licenses/by/4.0/>).

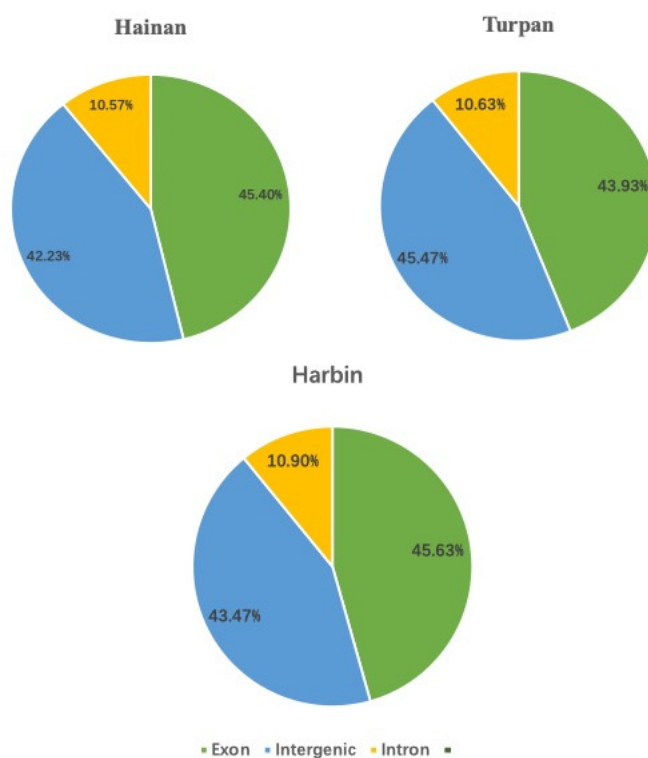

**Supplementary Figure S2.** The distribution of reads mapped to reference genome from three *Bemisia tabaci* geographic populations

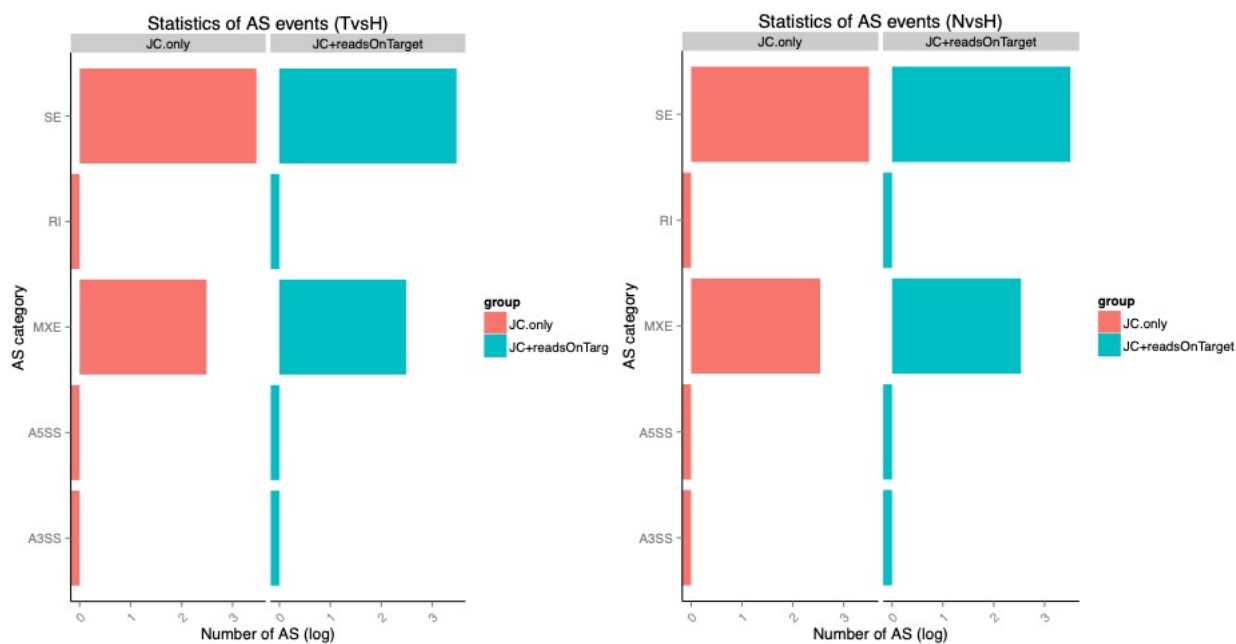

**Supplementary Figure S3.** Classification and Counting of Alternative splicing Events from two comparisons (T: Turpan; H: Harbin; N: Hainan)

\* SE: Skipped exon; MXE: Mutually exclusive exon; A5SS: Alternative 5' splice site; A3SS: Alternative 3' splice site; RI: Retained intron

**Supplementary Table S1** Summary of the quality of data output

| Sample name | Raw reads | Clean reads | clean bases | Error rate(%) | Q20(%) | Q30(%) | GC content(%) |
|-------------|-----------|-------------|-------------|---------------|--------|--------|---------------|
| T_1         | 42000720  | 39894888    | 5.98G       | 0.02          | 95.55  | 89.44  | 37.15         |
| T_2         | 44783106  | 42276006    | 6.34G       | 0.02          | 94.9   | 88.34  | 36.64         |
| T_3         | 46750216  | 44541656    | 6.68G       | 0.02          | 95.51  | 89.23  | 37.25         |
| H_1         | 46525472  | 44139430    | 6.62G       | 0.02          | 95.62  | 89.66  | 37.59         |
| H_2         | 52915098  | 49816812    | 7.47G       | 0.02          | 95.28  | 88.73  | 37.59         |
| H_3         | 59508372  | 56266916    | 8.44G       | 0.02          | 95.29  | 88.79  | 37.4          |
| N_1         | 49765444  | 47823190    | 7.17G       | 0.02          | 95.74  | 89.75  | 38.41         |
| N_2         | 44400592  | 41869522    | 6.28G       | 0.02          | 95.85  | 90.17  | 37.57         |
| N_3         | 45833748  | 44061888    | 6.61G       | 0.02          | 95.68  | 89.83  | 36.48         |

Supplementary Table S2 List of reads and reference genome alignment

1

| Sample name      | T_1                  | T_2                  | T_3                  | H_1                  | H_2                  | H_3                  | N_1                  | N_2                  | N_3                  |
|------------------|----------------------|----------------------|----------------------|----------------------|----------------------|----------------------|----------------------|----------------------|----------------------|
| Total reads      | 39894888             | 42276006             | 44541656             | 44139430             | 49816812             | 56266916             | 47823190             | 41869522             | 44061888             |
| Total mapped     | 28626392<br>(71.75%) | 28610618<br>(67.68%) | 32632565<br>(73.26%) | 31263253<br>(70.83%) | 36536167<br>(73.34%) | 39056824<br>(69.41%) | 35329405<br>(73.88%) | 30139913<br>(71.99%) | 30301158<br>(68.77%) |
| Multiple mapped  | 3686583<br>(9.24%)   | 3812385<br>(9.02%)   | 4289457<br>(9.63%)   | 4302940<br>(9.75%)   | 4926232<br>(9.89%)   | 5439613<br>(9.67%)   | 4676941<br>(9.78%)   | 4134175<br>(9.87%)   | 4141156<br>(9.4%)    |
| Uniquely mapped  | 24939809<br>(62.51%) | 24798233<br>(58.66%) | 28343108<br>(63.63%) | 26960313<br>(61.08%) | 31609935<br>(63.45%) | 33617211<br>(59.75%) | 30652464<br>(64.1%)  | 26005738<br>(62.11%) | 26160002<br>(59.37%) |
| Read-1           | 12708964<br>(31.86%) | 12656388<br>(29.94%) | 14411048<br>(32.35%) | 13722653<br>(31.09%) | 16106051<br>(32.33%) | 17066394<br>(30.33%) | 15598975<br>(32.62%) | 13217681<br>(31.57%) | 13326529<br>(30.25%) |
| Read-2           | 12230845<br>(30.66%) | 12141845<br>(28.72%) | 13932060<br>(31.28%) | 13237660<br>(29.99%) | 15503884<br>(31.12%) | 16550817<br>(29.41%) | 15053489<br>(31.48%) | 12788057<br>(30.54%) | 12833473<br>(29.13%) |
| Reads map to '+' | 12451550<br>(31.21%) | 12384769<br>(29.3%)  | 14152379<br>(31.77%) | 13461663<br>(30.5%)  | 15793250<br>(31.7%)  | 16799527<br>(29.86%) | 15316235<br>(32.03%) | 12989965<br>(31.02%) | 13064610<br>(29.65%) |
| Reads map to '-' | 12488259<br>(31.3%)  | 12413464<br>(29.36%) | 14190729<br>(31.86%) | 13498650<br>(30.58%) | 15816685<br>(31.75%) | 16817684<br>(29.89%) | 15336229<br>(32.07%) | 13015773<br>(31.09%) | 13095392<br>(29.72%) |
| Non-splice reads | 19298666<br>(48.37%) | 19758616<br>(46.74%) | 21579613<br>(48.45%) | 20405033<br>(46.23%) | 23657048<br>(47.49%) | 25770124<br>(45.8%)  | 22564645<br>(47.18%) | 19814815<br>(47.33%) | 20511928<br>(46.55%) |
| Splice reads     | 5641143<br>(14.14%)  | 5039617<br>(11.92%)  | 6763495<br>(15.18%)  | 6555280<br>(14.85%)  | 7952887<br>(15.96%)  | 7847087<br>(13.95%)  | 8087819<br>(16.91%)  | 6190923<br>(14.79%)  | 5648074<br>(12.82%)  |

2

3

**Supplementary Table S3** Classification and quantity statistics of Alternative splicing events in comparison between Turpan and Harbin

| Event Type                 | Num Events. JC. only | Sig Events. JC. only | Num Events. JC. + reads On Target | Sig Events. JC. + readsOn Target |
|----------------------------|----------------------|----------------------|-----------------------------------|----------------------------------|
| Skipped exon               | 2927                 | 185 (107:78)         | 2981                              | 195 (113:82)                     |
| Mutually exclusive exon    | 306                  | 67 (34:33)           | 306                               | 71 (38:33)                       |
| Alternative 5' splice site | 0                    | 0 (0:0)              | 0                                 | 0 (0:0)                          |
| Alternative 3' splice site | 0                    | 0 (0:0)              | 0                                 | 0 (0:0)                          |
| Retained intron            | 0                    | 0 (0:0)              | 0                                 | 0 (0:0)                          |

\* Num Events. JC. only: total number of alternative splicing events detected only by junction counts; Sig Events. JC. only: total number of differential alternative splicing events detected only by Junction Counts (the number of up-regulated alternative splicing events: the number of down-regulated alternative splicing events); Num Events. JC. + reads On Target: total number of alternative splicing events detected using both junction counts and reads on target. Sig Events. JC. + reads On Target: total number of differential alternative splicing events detected using both junction counts and reads on target (the number of up-regulated alternative splicing events: the number of down-regulated alternative splicing events).

**Supplementary Table S4** Classification and quantity statistics of Alternative splicing events in comparison between Hainan and Harbin

11

| Event Type                 | NumEv-<br>ents.JC.only | SigEvents.JC.only | NumEvents.JC.+readsOnTarget | SigEvents.JC.+readsOnTarget |
|----------------------------|------------------------|-------------------|-----------------------------|-----------------------------|
| Skipped exon               | 3159                   | 159(76:83)        | 3212                        | 168 (78:90)                 |
| Mutually exclusive exon    | 345                    | 73 (35:38)        | 345                         | 80 (41:39)                  |
| Alternative 5' splice site | 0                      | 0 (0:0)           | 0                           | 0 (0:0)                     |
| Alternative 3' splice site | 0                      | 0 (0:0)           | 0                           | 0 (0:0)                     |
| Retained intron            | 0                      | 0 (0:0)           | 0                           | 0 (0:0)                     |

\*Same as supplementary Table 3.

12

13

**Supplementary Table S5** Distribution of differential expressed genes in GO terms enriched in biological processes, cell components, and molecular functions

| Go terms           | NvsH   | TvsH   | TvsN   |
|--------------------|--------|--------|--------|
| Biological process | 62.43% | 58.44% | 62.15% |
| Cellular component | 11.29% | 14.46% | 11.46% |
| Molecular function | 26.28% | 27.10% | 26.39% |
